# Supplementary material
Source: HighWire-hosted journal article supplement (https://bmjopen.bmj.com/content/12/10/e067117)
Supplement: inline-supplementary-material-4 [file inline-supplementary-material-4.pdf]

## Appendix 4: List of Research Ethics Boards

### Canada

#### Nova Scotia Health Research Ethics Board

- Queen Elizabeth II Health Sciences Centre

#### Comité d'éthique de la recherche du CHU de Québec-Université Laval for:

- CHU de Québec – Université Laval (Hôpital de l'Enfant-Jésus)
- Montréal General Hospital
- CIUSSS de l'Estrie – CHU de Sherbrooke (Hôpital de Fleurimont)
- CIUSSS de la Mauricie-et-du-Centre-du-Québec (Centre hospitalier de Trois-Rivières)
- Centre Hospitalier de l'Université de Montréal (CHUM)

#### Ottawa Health Science Network Research Ethics Board (University of Ottawa Heart Institute Panel) for:

- The Ottawa Hospital (Civic Campus)
- Sunnybrook Health Sciences Center
- London Health Sciences Centre
- Hamilton Health Sciences Center
- St. Michael's Hospital
- Kingston General Hospital

#### University of Manitoba Biomedical Research Board

- Winnipeg Health Sciences Center

#### Saskatchewan Health Authority Research Ethics Board

- Regina General Hospital

#### University of Calgary Conjoint Health Research Ethics Board

- Foothills Medical Centre

#### University of Alberta Health Research Ethics Board (Biomedical Panel) for:

- University of Alberta Hospital
- Royal Alexandra Hospital

#### Vancouver Island Health Authority Clinical Research Ethics Board

- Victoria General Hospital

#### UBC Clinical Research Ethics Board

- Vancouver General Hospital

**United Kingdom**

West Midlands - Coventry & Warwickshire Research Ethics Committee for:

- Salford Royal Hospital
- St. Mary's Hospital (Imperial College Healthcare)
- University Hospital of Wales
- University of Nottingham Hospital
- Royal Stoke University Hospital
- James Cook University Hospital
- The Walton Centre
- Aintree University Hospital

Scotland A Research Ethics Committee Research Ethics Service

- Western General Hospital

**France**

Comité de Protection des Personnes (CPP) Est 1 for:

- CHU de Clermont-Ferrand
- CHU de Besançon
- Hôpital de Haute-pierre
- CHU de Nîmes

**Brazil**

Comissão nacional de ética em pesquisa provides national REB approval in Brazil

Comitê de Ética em Pesquisa do Hospital das Clínicas da Faculdade de Medicina da Universidade de São Paulo

- The Hospital das Clínicas da Faculdade de Medicina da USP

Comitê de Ética em Pesquisa do Hospital de Câncer de Barretos

- Santa Casa de Misericórdia de Barretos
